1 **Seeing distinct groups where there are none: spurious patterns from between-**  
2 **group PCA**

3  
4 Cardini, Andrea<sup>1-2</sup>, O'Higgins, Paul<sup>4,2</sup>, Rohlf, F. James<sup>3</sup>  
5  
6

7 **AUTHORS AFFILIATIONS**

8 <sup>1</sup>Dipartimento di Scienze Chimiche e Geologiche, Università di Modena e Reggio Emilia, Via  
9 Campi, 103 - 41125 Modena – Italy, <https://orcid.org/0000-0003-2910-632X>

10 <sup>2</sup>Centre for Forensic Anthropology, The University of Western Australia, 35 Stirling Highway,  
11 Crawley WA 6009, Australia

12 <sup>3</sup>Department of Anthropology and Department of Ecology and Evolution, Stony Brook University,  
13 Stonybrook, NY 11794-4364, <https://orcid.org/0000-0003-0522-3679>

14 <sup>4</sup>Department of Archaeology and Hull York Medical School, University of York, Heslington, York,  
15 YO10 5DD, <https://orcid.org/0000-0002-9797-0809>  
16

17 Corresponding Author: F. James Rohlf, e-mail address: [f.james.rohlf@stonybrook.edu](mailto:f.james.rohlf@stonybrook.edu); tel. 001  
18 631-632-8580  
19

20 **KEYWORDS**

21 Covariance, geometric morphometrics, group separation, isotropic model, spurious clustering  
22

23 **RUNNING TITLE**

24 Spurious clustering in bgPCA

## 1 **Abstract**

2

3 Using sampling experiments, we found that, when there are fewer groups than variables, between-groups PCA (bgPCA)  
4 may suggest surprisingly distinct differences among groups for data in which none exist. While apparently not noticed  
5 before, the reasons for this problem are easy to understand. A bgPCA captures the  $g-1$  dimensions of variation among  
6 the  $g$  group means, but only a fraction of the  $\sum n_i - g$  dimensions of within-group variation ( $n_i$  are the sample sizes),  
7 when the number of variables,  $p$ , are greater than  $g-1$ . This introduces a distortion in the appearance of the bgPCA plots  
8 because the within-group variation will be underrepresented, unless the variables are sufficiently correlated so that the  
9 total variation can be accounted for with just  $g-1$  dimensions. The effect is most obvious when sample sizes are small  
10 relative to the number of variables, because smaller samples spread out less, but the distortion is present even for large  
11 samples. Strong covariance among variables largely reduces the magnitude of the problem, because it effectively  
12 reduces the dimensionality of the data and thus enables a larger proportion of the within-group variation to be  
13 accounted for within the  $g-1$ -dimensional space of a bgPCA. The distortion will still be relevant though its strength will  
14 vary from case to case depending on the structure of the data ( $p$ ,  $g$ , covariances etc.). These are important problems for  
15 a method developed mainly to analyze variation among groups when there are very large numbers of variables and  
16 relatively small samples, a common situation in fields ranging from morphometrics (as in our examples) to molecular  
17 analyses.

18

1

2

## 3 Introduction

4

5 As a general trend, modern science tends to generate a very large number of variables ( $p$ ) from samples that can vary  
6 widely in size ( $n$ ) and often includes few individuals relative to the number of variables. Indeed, the ‘Omics’ revolution,  
7 brought forward by the rapid advancement of informatics and molecular biology, offers some of the best examples of  
8 this trend. For instance, microarray analyses may include hundreds of genetic markers from a relatively small number  
9 of individuals (Culhane et al. 2002 is an example). However, statistically analyzing such high dimensional data with  
10 relatively small sample sizes ( $p/n$  ratios) is an important and challenging problem.

11 A variety of methods for dimensionality reduction are available in the statistical literature (Izenman 2008).  
12 Among these, principal component analysis (PCA) is still probably the most popular in biology. A PCA is a rigid  
13 rotation of the multidimensional space of all the variables followed by a projection of the data onto relatively few  
14 (usually just 2 or 3) orthogonal axes that together account for as much of the overall variance as possible, though there  
15 is no reason for the axes themselves to be especially meaningful biologically. When  $p \geq n$ , a PCA can only extract at  
16 most  $n-1$  uncorrelated dimensions that, together, contain all the information about the variances and covariances of the  
17 original  $p$  variables (all  $p$  dimensions can be extracted when  $p < n$ ). Often, there are dominant directions of variance so  
18 that a relatively small number of PCs may account for most of the variation. The first (higher order) PCs capture the  
19 major aspects of covariation in the sample and the later PCs the smaller ones. Bookstein (2017) first brought attention  
20 to the Marchenko-Pastur theorem that shows that large  $p/n$  ratios cause an exaggeration of the sizes of the eigenvalues  
21 for the first PCs relative to those of the last PCs, thus giving a misleading impression of the relative importance of the  
22 patterns that they seem to suggest. The initial motivation for the present paper was to investigate whether large  $p/n$   
23 ratios might cause problems for the relatively new and increasingly popular type of PCA, between-group PCA  
24 (bgPCA). In this method a PCA is performed on the covariance matrix based on the  $g$  sample means (rather than on the  
25 original data matrix) followed by the projection of the original  $n$  samples onto these bgPC axes. Plots of these axes are  
26 then used to illustrate the distances between sample means and allow a user to judge the distinctiveness of the groups.

27 To investigate the effect of varying  $p/n$  ratios on bgPCA, sampling experiments were performed using both  
28 isotropic data (independent variables with equal means and variances called Model 1 below) and data constructed from  
29 an actual morphometric study but with no true differences among the group means (called Models 2-3 below). Fig. 1  
30 shows the result of bgPCAs using  $g = 3$  groups with the same true means (i.e., no real group differences), a constant  
31 total sample size ( $n=120$ ), and an increasingly larger numbers of variables ( $p=12, 120$  or  $360$ ). On the left (Fig. 1A) are  
32 bgPCA plots for isotropic data Model 1, below) for  $g = 3$  groups of identical size ( $n_i = n/3 = 40$ ). On the right (Fig.  
33 1B), the same  $n_i$ ,  $g$  and  $p$  are used as in Fig. 1A but based on correlated morphometric variables from real data, which  
34 have been randomly divided into three groups so that there are no real group differences. Convex hulls for each group  
35 are shown in order to identify group memberships for each sample. Rather than showing the groups superimposed as  
36 one might expect, because there are no true differences, Fig. 1 shows that bgPCA created an apparent clustering of the  
37 samples around their group means as first noticed by one of us (AC). The groups appear increasingly distinct from one  
38 another as the  $p/n$  ratio increases because larger numbers of variables are used. The effect is particularly evident for  
39 isotropic data and less pronounced but still present for correlated variables. The primary focus of the present paper is on

1 the reasons for such spurious clustering and predicting the magnitude of this distorted summary of group differences.  
2 The companion paper, Bookstein (2019), also examines the effect of large  $p/n$  ratios on the bgPCA method but in  
3 relationship to the predictions of the Marchenko-Pastur theorem as described in Bookstein (2017), along with two other  
4 aspects of the problem: the role of variations in sample sizes of the groups, and the effect of correlations among the  
5 variables based on a variety of factor models. Importantly, it also suggests ways of evaluating the impact of these  
6 effects when analyzing actual data sets. In contrast, our concern here is largely with explaining the possible false  
7 clustering and the magnitude of the effect. We use sampling experiments and examples from our own field,  
8 morphometrics, i.e. the quantitative study of biological forms (Bookstein 1991, Blackith and Reyment 1971). However,  
9 the issue and its implications are general and apply similarly to multivariate data used to compare groups in other fields  
10 such as genetics.

11 Phenotypic variation is complex and, although the number and choice of morphometric descriptors should be  
12 determined by the specific study hypothesis (Oxnard and O'Higgins, 2011), morphometric studies are often  
13 exploratory, tending to employ large numbers of variables, which make this discipline typically highly multivariate  
14 (Blackith and Reyment 1971). This is intrinsically true for landmark coordinate-based GM (geometric morphometrics),  
15 because each additional landmark or semilandmark adds two variables to a 2D study or three to a 3D study. While the  
16  $p/n$  ratios are very variable (Table 1), datasets used in GM studies often have many more measurements than  
17 specimens. This is particularly common in, but not exclusive to, anthropology, the discipline in which semilandmark  
18 methods for the analysis of curves and surfaces were developed and are widely employed to study human evolution  
19 (Bookstein 1997; Gunz and Mitteroecker 2013; Slice 2005). Semilandmarks are typically closely spaced sets of  
20 arbitrary points used to 'discretize' anatomical features, such as curves and surfaces, that are devoid of clearly  
21 corresponding landmark points; therefore, they can greatly increase the number of variables in a study. Indeed, a  
22 propensity for morphometrics to employ large numbers of variables has become especially evident in the last decade,  
23 thanks to new, cheaper and faster instruments for the acquisition and analysis of 3D images. For instance, almost 60%  
24 of about 1000 entries, retrieved at the end of 2018 in Publish or Perish (<https://harzing.com/resources/publish-or-perish>)  
25 using google scholar to search "geometric morphometrics AND semilandmarks", were papers published since 2013.

26 A particularly important topic in biology is the description and interpretation of group differences in  
27 multivariate spaces, an important topic in biology. Various approaches have been suggested to summarize among group  
28 variation in scatterplots (ordination methods) and to classify individuals in groups. Yet, today's most commonly  
29 multivariate technique for separating groups is still multi-group linear discriminant analysis (DA), also known as  
30 canonical variates analysis (CVA), originally proposed by Fisher (Fisher 1936) and Mahalanobis (Mahalanobis, 1936).  
31 However, a limit for using DA/CVA in a study is that, for statistical reliability, it requires sample sizes greatly  
32 exceeding the count of variables in the analysis (Mitteroecker and Bookstein, 2011), and indeed it is not even  
33 computationally defined if  $p > n - g$ . In these instances, a between-group PCA (bgPCA) has been suggested as an  
34 interesting potential alternative to explore group structure. To our knowledge, this method was originally proposed by  
35 Yendle and MacFie (1989) who called it "discriminant principal components analysis" (DPCA), though it does not  
36 involve a standardization by the within-group variation as in DA and CVA. Another early paper is Culhane et al.  
37 (2002), who applied it to the analysis of high-dimensional microarray data. While bgPCA has similarities with  
38 discriminant functions, but also, as discussed by Boulesteix (2005), has relationships to partial least-squares dimension  
39 reduction methods. Compared to DA/CVA, bgPCA is just a PCA and does not involve standardizing the variables  
40 based on the variation within groups (Seetah et al. 2012). Also, as with DA/CVA, bgPCA has been used for

1 classification, and thus for predicting group affiliation based on bgPCs, an aim which should be achieved with a cross-  
2 validation, as exemplified by leave-one-out jack-knife used in Culhane et al. (2002) and Seetah et al. (2012). However,  
3 in contrast to a DA/CVA (Kovarovic et al. 2011; Mitteroecker and Bookstein 2011), a bgPCA does not require  
4  $p \leq n - g$ , which is why it has been claimed that “in ... between-group PCA there is NO restriction on the number of  
5 variables” (<https://www.mail-archive.com/morphmet@morphometrics.org/msg05221.html>).

## 7 Description of the bgPCA method

8 The bgPCA procedure (see Boulesteix, 2005, for a formal description) is used to reduce the dimensionality of  
9 multivariate data to just those dimensions necessary to account for the differences among the  $g$  group means. Each  
10 sample is based on  $n_i$  individuals for a total sample size of  $n = \sum n_i$  or  $n = gn_i$  in the case of equal sample sizes, as  
11 will be assumed here for simplicity. bgPCA is performed by projecting the original  $n \times p$  data matrix,  $\mathbf{X}$ , onto the matrix,  
12  $\mathbf{E}$ , of the normalized eigenvector of the among-group SSCP matrix  $\mathbf{A} = \sum_i^g n_i (\bar{\mathbf{x}}_i - \bar{\bar{\mathbf{x}}})' (\bar{\mathbf{x}}_i - \bar{\bar{\mathbf{x}}})$ , where  $\bar{\mathbf{x}}_i$  is the  
13 row vector for the mean of the  $i$ th group and  $\bar{\bar{\mathbf{x}}}$  is the grand mean vector. The  $\mathbf{A}$  matrix is at most of rank  $g-1$  because it  
14 is a PCA of just the matrix of  $g$  means so only the first  $g-1$  eigenvalues can be greater than zero and thus only the first  
15  $g-1$  columns of  $\mathbf{E}$  need to be retained. The  $n \times (g-1)$  transformed data matrix is then  $\mathbf{X}' = \mathbf{X}\mathbf{E}$ . Based on these, the  
16 transformed within-group and among-group SSCP matrices are  $\mathbf{W}' = \mathbf{E}'\mathbf{W}\mathbf{E}$  and  $\mathbf{A}' = \mathbf{E}'\mathbf{A}\mathbf{E} = \mathbf{\Lambda}$ , the diagonal  
17 matrix of the first  $g-1$  eigenvalues of  $\mathbf{A}$  (note: the superscript “t” indicates matrix transpose). Importantly, the number  
18 of bgPCs cannot be more than  $g-1$ . Importantly, thus, with just two groups, there are only two group means, and one  
19 needs a single dimension to represent differences between two points; thus, when  $g = 2$ , there is only one bgPC. If there  
20 are three groups, the differences among the three corresponding means can be fully described by a plane passing  
21 through the three mean points, and thus by just two bgPCs. With  $g > 3$  the rationale is the same and the number of  
22 bgPCs is  $g-1$ , but the geometric representation is not as easy, because we cannot represent multivariate spaces with  
23 more than three dimensions in a single scatterplot and even a 3D scatterplot (as with  $g = 4$ ) can be difficult to interpret  
24 (Mitteroecker et al. 2005).

## 26 Sampling experiments

27 As mentioned above, the first set of sampling experiments, shown in Fig. 1, were based on two different models, one  
28 (Fig. 1A) being the same as model 1 (below) and the other (Fig. 1B) being similar to models 2-3 (below). In all  
29 instances, there are no true differences among the means of the groups and the groups have the same size. Thus, in more  
30 detail, the models used in the more extensive sampling experiments described below, were:

31 Model 1: A purely isotropic model with  $p$  independent random normally distributed variables, each with  $\mu = 0$   
32 and  $\sigma = 1$ . This model was used for Figs. 1A, 2, and 4 below.

33 Model 2-3: Random normally distributed variables with the same true covariance matrix as that of a real  
34 morphometric dataset, but with all means equal to zero:

35 Model 2: Procrustes shape coordinates from a sample of 45 adult yellow-bellied marmot (*Marmota*  
36 *flaviventris*) left hemimandibles. The original 2D configuration consists of 10 landmarks and 50  
37 semilandmarks, with the semilandmarks slid in TPSRelw (Rohlf 2015) using the minimum Procrustes

1 distance criterion. This data matrix was then used to compute the covariance matrix among the  
2 variables and its corresponding eigenvector matrix and eigenvalues. All eigenvectors that had positive  
3 eigenvalues were retained. These were then used as described below to generate random data matrices  
4 with the covariance matrix taken from the original dataset.

5 Model 3: Procrustes shape coordinates from a sample of 171 adult male vervet monkey skulls, which are part  
6 of a larger published dataset (Cardini and Elton 2017). There were 86 3D skull landmarks (Cardini et  
7 al. 2007; Cardini and Elton 2017). As with Model 2, as described below, these were used to generate  
8 samples of random variables with the same true covariance matrix as in the original data.

9  
10 A sample,  $\mathbf{X}$ , from a population with a given true covariance matrix of  $\Sigma$  was generated using the following  
11 relationship.  $\mathbf{X} = \mathbf{Y}\mathbf{E}\mathbf{\Lambda}^{1/2}$ , where  $\mathbf{Y}$  is an  $n \times p$  matrix of independent random normally distributed numbers,  $\mathbf{E}$  is a  $p \times p$   
12 matrix of normalized eigenvectors of  $\Sigma$ , and  $\mathbf{\Lambda}$  is a  $p \times p$  matrix of its eigenvalues. A difference between sampling  
13 experiments using the isotropic model (Model 1) and all others based on actual data (Model 2-3) is that the total number  
14 of landmarks limits the largest  $p$  employed in the sampling experiments, because the method cannot construct more  
15 dimensions than are in the original data.

16 In the sampling experiments that follow, the data were subjected to a bgPCA using code written by FJR in  
17 MATLAB and group separation was assessed by computing an index of overlap between pairs of samples. Let  $O_{ij}$  be  
18 the proportion of individuals in a group  $i$  that are actually closer to the mean of group  $j$ . When the dispersions in two  
19 groups  $i$  and  $j$  do not overlap,  $O_{ij}$  will be equal to 0 and will approach 0.5 for a pair of groups that overlap almost  
20 perfectly because in that case a point is equally likely to be closest to either mean. The average,  $\bar{O}_{ij}$  for all pairs of  
21 samples in a particular analysis is used as the measure of overlap. Initially, the amount of overlap between convex hulls  
22 was considered, but this has some unsuitable properties (such as rapid decrease in the probability of overlap as the  
23 number of dimensions increases even without the bgPCA transformation).

## 24 **What happens when $n$ or $g$ are changed relative to $p$ ?**

25  
26  
27 Figure 2 summarizes the results of sampling experiments using  $\bar{O}_{ij}$  as a measure of overlap and varying  $g$ ,  $n_i$ , and  $p$ .  
28 The figure uses  $n_i$  rather than  $n$  because the total size is not relevant for the computation of average overlap as they  
29 depend on the relationships among pairs of samples and not the number of samples (and thus not on the total sample  
30 size). The sampling experiments used  $g = 3$  and 6 groups, sample sizes of  $n_i = 20$  and 40, and a range of values for the  
31 number of dimensions,  $p$ . Figure 2 shows the expected outcome that overlap is larger when  $p$  is smaller,  $n_i$  larger, and  
32 when there are more groups. The effect of  $p$  is strongest for the isotropic model, but the effect is clear for all three  
33 models. The companion paper also demonstrates the effect of relaxing the assumption of equal sample sizes.

## 34 **Mathematical interpretation: why the apparent separation of groups as $p$ increases?**

1 Because the  $\bar{O}_{ij}$  index seems difficult to work with analytically, an alternative index inspired by the partitioning of  
2 sums of squares in an anova or MANOVA was investigated for the simple null model (Model 1) used above, i.e.,  
3 samples of independent normally distributed random variables from the same population. As an approximation,  
4 covariances among the variables are ignored (as they should be minimal for isotropic data) and the group differences  
5 described in terms of the traces (sums of the diagonal elements) of the usual within and among-groups sums of squares  
6 matrices, rather than the usual multivariate test statistics such as Wilks' Lambda or Lawley-Hotelling  $U$  statistics,  
7 which require the computation of the matrix inversion and determinants of the sums of squares matrices.

8 The reader should carefully note that all expressions in Table 2 are based just on the  $g-1$  dimensional space of  
9 the bgPCA transformed data. Thus, the within-group sums of squares here only refers to the part of total within group  
10 sums of squares expected in this subspace. This table is not intended for statistical testing (unlike that of a standard  
11 MANOVA, which would use the variation in the  $p$ -dimensional space of the original variables), but specifically to  
12 produce an explanation for the apparent differences between groups such as shown Fig 1A.

13 As above, let  $\mathbf{A}$  represent the among-groups SSCP matrix based on all  $p$  variables and  $\mathbf{E}$  its matrix of  
14 normalized eigenvectors. After projecting the data for all samples onto these vectors, one has a bgPCA transformed data  
15 matrix  $\mathbf{X}' = \mathbf{X}\mathbf{E}$ . At most, only the first  $g-1$  columns of  $\mathbf{E}$  and thus  $\mathbf{X}'$  are nonzero, so we will use only the first  $g-1$   
16 columns. Let  $\mathbf{A}'$  be the among-groups SSCP matrix based on this transformed data matrix. The sum of the eigenvalues  
17 of  $\mathbf{A}$  and  $\mathbf{A}'$  are equal because all of the variation among  $g$  means is captured in a  $g-1$  dimensional space. Similarly,  
18 one can define  $\mathbf{W}$  as the within-groups SSCP matrix using the original  $p$  variables and  $\mathbf{W}'$  as the equivalent matrix  
19 using the projections of the data onto  $\mathbf{E}$ . Note that its trace  $tr(\mathbf{W}')$  will, in general, be less than that of  $\mathbf{W}$  because  
20 only within-group variation in the  $g-1$  dimensions in which the means differ is preserved by the projection onto the  $g-1$ -  
21 dimensional bgPCA space. The  $\mathbf{W}$  matrix has  $n-g$  degrees of freedom and thus would require  $\min(n-g, p)$   
22 dimensions to account for all the within-group variation.

23 Consider sampling experiments, such as described in the prior section for Model 1, where  $n_i$  specimens are in  
24 each sample (assuming equal sample size, so that  $n = gn_i$ ) are drawn from the same  $p$ -dimensional multivariate  
25 normal distribution, that has a mean vector  $\boldsymbol{\mu} = \mathbf{0}_p$  (a vector of  $p$  zeroes) and a covariance matrix of  $\boldsymbol{\Sigma} = \mathbf{I}_p$  (a  $p \times p$   
26 identity matrix). The true  $\mathbf{W}$  matrix would then be  $(n-g)\mathbf{I}_p$  with  $tr(\mathbf{W}) = p(n-g)$ . The true among groups  
27 variance component matrix,  $\boldsymbol{\Sigma}_A$ , is  $\mathbf{0}_p$  because there are no true differences among the population means. However,  
28 due to sampling error the expected among-groups covariance matrix is  $\boldsymbol{\Sigma} + n_i\boldsymbol{\Sigma}_A$ . For the transformed data, the trace of  
29 the observed among-groups SSCP matrix is unchanged by the transformation because all of the variation among  $g$   
30 means will be accounted for by the  $g-1$  eigenvectors. However, the trace of the expected within-groups SSCP matrix  
31 will be reduced by the fraction  $(g-1)/p$  assuming the remaining  $n-g$  dimensions of within-group variation are just a  
32 random sample of the total variation (reasonable here because, as mentioned above, there are no actual differences).  
33 These relations are conveniently summarized in the format of a MANOVA table (Table 2), but just using the trace of  
34 each matrix as a summary of the relative amounts of within and among samples variation captured in the bgPCA space  
35 only.



1 The expressions in Table 2 are compared in Table 3 with the results from two sampling experiments. The  
2 example in the upper half is for the case where there are fewer variables but larger sample sizes in each group. The  
3 second for the case where the number of variables is larger and sample sizes are smaller. The values are averages over  
4 10,000 replications and show the close agreement with the expected values (given in parentheses) computed using the  
5 formulas from Table 2.

6 Note that the  $F_{iso}$  ratio defined in Table 2 (ratio of traces of among to within group MS using only the  $g-1$   
7 bgPCs) is analogous to an  $F$ -ratio and is a function of just  $p$  and  $g$ . The subscript “iso” is to remind the reader that it  
8 assumes isotropic data and is not the usual  $R^2$  statistic. Figure 3 shows plots of  $R_{iso}^2 = p / (p + g(n_i - 1))$  as a  
9 function of  $n_i$  and  $p$  for  $g = 3$  and  $6$  that illustrate how  $R_{iso}^2$  increases as a function of  $p$  (suggesting more distortion  
10 with more variables), but decreases as a function of  $n_i$  (indicating less separation of groups with larger samples). For a  
11 given  $p$  and  $n_i$ , if  $g$  is smaller, and therefore also  $n = gn_i$  is smaller, the denominator in the  $R_{iso}^2$  formula is reduced  
12 and  $R_{iso}^2$  becomes larger, which is why the  $R_{iso}^2$  surfaces in Figure 3 are higher for  $g = 3$  than for  $g = 6$ . This is because  
13 adding more groups increases the dimensionality of the bgPCA space and thus should account for a larger proportion of  
14 the within-group variation.

15 The reader should note that larger  $R_{iso}^2$  implies more separation and thus less overlap as measured by  $\bar{O}_{ij}$ .  
16 Fig. 4 shows a scatterplot  $\bar{O}_{ij}$  as a function of  $R_{iso}^2$  using the data from Fig. 2. The slope of the relationship differs for  
17 data from the different models. The slope is less steep for the models with correlated variables. Within each dataset the  
18 scatter corresponds to the effects of different values of  $g$  and  $n_i$ . The  $R_{iso}^2$  statistic is somewhat ad hoc, but Figure 4  
19 (below) shows that it is a useful predictor of overlap for isotropic data.

20

## 21 **The effect of covariation among variables.**

22 The isotropic Model 1, used in the previous section, is based on the unrealistic assumption that the variables  
23 are independent and have equal variances. Intuitively, one might expect that data with highly correlated variables might  
24 be less prone to overestimating of the degree of group separation, and indeed the sampling experiments presented in  
25 Figs. 1B, 2 and 4 do show less spurious separation for data with correlated variables (i.e., the models using vervet and  
26 marmot covariance matrices). If, as an extreme case, because of a strong correlation between variables, all of the  
27 variation in a dataset could be accounted for with just  $g-1$  dimensions, then all of the within-group variation would also  
28 be captured by the  $g-1$  among-groups dimensions of the bgPCA and no information would be lost. The  $R_{iso}^2$  statistic  
29 described above should then be close to 0 and  $\bar{O}_{ij}$  should measure the correct amount of overlap between groups,  
30 which should be close to 0.5 if there are no real groups).

31 In order to investigate the effect of covariation using sampling experiments, one must specify a model for the  
32 pattern and strengths of the correlations. The selection of a model can be simplified because one can rotate the data  
33 matrix to its principal axes, so that one need only consider models that differ in how the eigenvalues decrease as a  
34 function of their number. For independent variables they would decrease somewhat according to the Marchenko–Pastur  
35 formula (Bookstein 2017), but for highly correlated variables they would decrease more rapidly. A very simple model is



1 that the logs of the eigenvalues,  $\ln(\lambda_i)$ , decrease linearly as a function of the log of their number, that is,  
2  $\ln(\lambda_i) = a - b \ln(i)$  or as  $\lambda_i = e^{-bi}$ , where  $a$  is a constant greater than 0 (ignored here) and  $b$  determines how  
3 rapidly the eigenvalues decrease. This approach also models the effect of unequal variances for the different variables.  
4 More realistic models with a factor structure could have been investigated, but this model seems sufficient to illustrate  
5 the effect of different proportions of the variance being accounted for by the first  $g-1$  dimensions. Fig. 5A shows  
6 examples with  $b$  varied from 0 to 1. Larger values of  $b$  yield increasingly rapid declines of successive eigenvalues,  
7 which imply stronger correlations among variables.

8 Fig. 5B shows the results of, sampling experiments with  $g = 3$  groups of  $n_i = 20$  observations each, with  $p$   
9 ranging from 3 to 80, and each replicated 1000 times, for the  $b$  values used in Fig. 5A. The effect of increasing  
10 correlations among the variables was to reduce the size of the expected  $R_{iso}^2$  statistic implying a larger  $\bar{O}_{ij}$  and thus  
11 less spurious clustering of points around the means. Many morphometric datasets follow patterns like that shown for  $b$   
12 = 1 or even more extreme. For instance, the curve for the marmot mandible dataset (Model 2) would be even more  
13 extreme than the curve shown for  $b = 1$ . The curve for the vervet data (Model 3) is less extreme. Thus, it is not  
14 surprising that Fig. 1 shows that for data with highly correlated variables there will be much less spurious group  
15 separation than that found for the isotropic model (Model 1).  
16

## 17 Discussion

18 Sampling experiments described above show that bgPCA ordinations may tend to exaggerate differences between  
19 groups relative to the amount of within-group variation. In extreme cases, with few groups, small samples and very  
20 many variables, bgPCA may consistently show perfect separation of the groups even when there are no true differences  
21 among group means. This is in part because the  $g-1$  dimensions of a bgPCA capture the entire amount of variation  
22 among the  $g$  group means, but only a fraction of the within-group variation when  $p > g-1$ . Thus, most of the variance  
23 within groups is lost when  $p$  is much larger than  $g-1$ . With small samples, the groups may appear quite distinct, and any  
24 apparent group differences will largely be an artefact of very large sampling error (Cardini & Elton 2007; Cardini et al.  
25 2015). This means that, in such cases, the inaccuracies in group mean estimates are captured by the bgPCs, as if they  
26 were true differences, and used to define the  $g-1$  dimensional space.

27 Not surprisingly, one can also see in Figure 2 that, with the same  $p$  and  $g$ , larger samples overlap more than  
28 smaller samples. Indeed, whether there are true differences or not, for a single variable the range of variation within a  
29 sample is expected to increase as its sample size increases. Similarly, the spread of multivariate samples is also  
30 expected to increase with sample size and thus there is a greater chance of samples overlapping.

31 In summary, the distortion showing a consistent spurious degree of separation between groups is not a  
32 promising property for a method that was proposed to analyze data with large numbers of variables and small samples,  
33 but the picture is complex, because the gravity of the problem, as nicely exemplified by Figure 4, varies sharply from  
34 case to case. Indeed, the severity of the distortion depends on both  $g$  and  $n_i$  relative to  $p$ , as well as on how strongly  
35 variables covary and whether true differences are indeed present (a case which we did not explore in our simulations).

36 Among the factors that might reduce the distortion, or even make it negligible, covariance is one of the most  
37 interesting, as it is expected in most biological datasets. The reason why covariance mitigates against the problem of  
38 bgPCA spurious group separation is that, with correlated variables, the number of truly independent dimensions is

1 reduced and, therefore, operationally, it is as if the  $p/g(n_i - 1)$  ratio was smaller. Yet, the problem is clearly still  
2 there, as both separation and  $R_{iso}^2$  in bgPCA space still increase with  $p$ . Thus, the main conclusion is the same: even  
3 with covariances, with a large  $p/g(n_i - 1)$  ratio, not only might one see groups that are overly separated, as in our  
4 sampling experiments, but also, if there are true groups, differences will be inflated by a case-specific degree, which is  
5 difficult to predict a priori.

6 When the effect of covariance is considered in studies using Procrustes-based GM, it is important to bear in  
7 mind also that additional covariance is introduced by the Procrustes superimposition itself (Rohlf and Slice 1990). Its  
8 importance here might partly depend on factors such as the number and distribution of the anatomical points used in the  
9 configuration, as well as the presence of semilandmarks and their mathematical treatment (Cardini 2018). Indeed, the  
10 marmot data, which include slid semilandmarks, show less spurious group separation in bgPCs. This is might be  
11 because of an especially strong covariance, as suggested by the observation that 90% of the total variance in these data  
12 can be accounted for by just the first 10 PCs. To what extent this strong covariance depends on real covariation among  
13 measurements (i.e., the points used to capture mandibular shape) or the additional covariance introduced by the  
14 superimposition, it is impossible to say and this implies that adding semilandmarks and sliding them is clearly not a  
15 solution to the distortion in bgPCAs. By contrast, the vervet data, that shows more spurious clustering, requires 56 PCs  
16 to account for the same percentage of the total variance. Indeed, these observations suggest that one could preliminarily  
17 explore the impact of covariance by first performing the usual PCA to check how much of the total variance can be  
18 accounted for in  $g-1$  dimensions: if a large proportion is accounted for by  $g-1$  dimensions, that might indicate a  
19 covariance so strong that most of the total variance might fit in the bgPCA space, thus strongly reducing the risk of  
20 overestimating the degree of group separation despite a large  $p/n$  ratio.

21 In datasets where strong correlations among variables are expected, such as is common in GM, where many  
22 semilandmarks are used (because physically close semilandmarks tend to covary strongly), one might hope to  
23 circumvent some of the issues raised in this paper by reducing the number of variables used in the bgPCA. Indeed, in  
24 GM studies, it is often the case that distance matrices among specimens assessed using a few landmarks are highly  
25 correlated with those derived from the full set of landmarks plus many semilandmarks (Skinner et al, 2009; Ferretti et  
26 al. 2013; Watanabe, 2018; Galimberti et al. 2019). This can be assessed formally, for instance, through matrix  
27 correlations where full (all landmarks and semilandmarks) and reduced (a subset of the full configuration) data matrices  
28 are often highly correlated. Thus smaller ratios of  $p/g(n_i - 1)$  can be achieved at the outset, simply by limiting the  
29 number of variables used in the study. If this is done, the resulting visualizations of shape differences among specimens  
30 will be less detailed, because fewer landmarks are used, but results of bgPCA will be less likely to be misleading.

31 It is also important to bear in mind that scatterplots are not the only tool for assessing group differences.  
32 Results from a bgPCA can be complemented by tests of significance, as well as by cross-validated classifications of  
33 groups (e.g., Seetah et al. 2012). With small samples, and/or negligible group separation in the full data space, group  
34 differences using all  $p$  variables will be non-significant, thus warning the user that any appearance of group separation  
35 in bgPCA scatterplots should be regarded with suspicion. Also, one of the main aims in the formulation of bgPCA by  
36 Culhane et al. 2002 was classification, and cross-validated bgPCAs in the full data space, using the same parameters as  
37 in the simulations performed in this paper, produce on average the expected percentages of correctly classified  
38 individuals according to groups (i.e., in the absence of real groups, approximately 33% for  $g=3$  and 17% for  $g=6$  -

1 results not shown). Thus, as with non-significance in tests using all  $p$  variables, finding a cross-validated accuracy only  
2 negligibly different from that expected by chance should warn users about possible distortions in the scatterplots.

3  
4 In conclusion, big datasets are increasingly common, but having very many variables does not ‘counterbalance’ the  
5 effect of small  $n$  – it could make it worse as shown here and in Bookstein (2019). Thus, we show that in attempting to  
6 assess group distinctiveness using bgPCA there is a potential trap, in that spurious apparent groupings may emerge in  
7 scatterplots, especially when the subspace spanned by the  $g-1$  bgPCs does not adequately reflect within group variation,  
8 as is increasingly likely to happen when  $p/n$  is large and  $g$  is small. The appearance of spurious groups in bgPCA offers  
9 a good reminder of how a large number of descriptors might bring problems as well as benefits, with the problems  
10 sometimes potentially outweighing the benefits. Indeed, as with other methods (Hair et al. 2009; Bookstein 2017),  
11 bgPCA provides another example of the potential perils of high dimensional data, and of the possible misuse of  
12 techniques and misinterpretation of findings, when the basic issues of sampling error and data dimensionality are not  
13 clearly borne in mind.

## 14 15 **Acknowledgement:**

16 We are very grateful to Jessica Grisenti, who carefully collected the marmot data for her undergraduate thesis  
17 and gave AC permission to use them. The authors appreciate the helpful comments of reviewers.

## 18 **Dedications:**

19 The paper is dedicated to the memories of Nicola Saino (1961 - 2019) and Dennis Slice (1958 - 2019).

20 Nicola was one of the greatest Italian ethologists, Professor of Animal Behaviour at the University of Milan,  
21 and extraordinary ornithologist: AC will always remember with fondness the day Nicola introduced him, and other  
22 biology students, to the wonders of birdwatching; he will also never forget his brilliant example as a teacher and  
23 researcher; and he will greatly miss the passionate fights, with him, over methods.

24 Dennis Slice Professor in the Dept. of Scientific Computing, The Florida State University was an Evolutionary  
25 biologist and Ecologist who made major contributions to morphometrics through his scientific and software  
26 contributions, by maintaining and moderating the MORPHMET discussion group and by being a tireless supporter and  
27 educator of students and colleagues. For his contributions, he was awarded the Rohlf Medal for Excellence in  
28 Morphometric Methods and Applications in 2017. Not only was he a tireless advocate of his field but he was a  
29 wonderful colleague, always available and always thoughtful. We will miss him greatly as both a scientist and a  
30 colleague.

## 31 32 **Compliance with Ethical Standards**

33 *Conflict of interest.* The authors declare that they have no conflicts of interest.

34

1

## References

- 2 Blackith, R. E. and R. A. Reyment (1971). *Multivariate Morphometrics*. New York, Academic Press.
- 3 Bookstein, F. L. (1991). *Morphometric tools for landmark data: Geometry and Biology*. New York, Cambridge Univ.  
4 Press.
- 5 Bookstein, F. L. (1997). Landmark methods for forms without landmarks: morphometrics of group differences in  
6 outline shape. *Medical Image Analysis*, 1, 225–243.
- 7 Bookstein, F. L. (2017). A Newly Noticed Formula Enforces Fundamental Limits on Geometric Morphometric  
8 Analyses. *Evolutionary Biology*, 44(4), 522–541. doi:10.1007/s11692-017-9424-9
- 9 Bookstein, F. L. (2018). *A Course in Morphometrics for Biologists*. Cambridge Univ. Press.
- 10 Bookstein, F. L. (2019). Pathologies of Between-Groups Principal Components Analysis in Geometric Morphometrics.  
11 *Evolutionary Biology*, submitted.
- 12 Boulesteix, A.-L., 2005. A note on between-group PCA. *Int. J. Pure Appl. Math.*, 19, 359-366.
- 13 Cardini, A. (2018). Integration and Modularity in Procrustes Shape Data: Is There a Risk of Spurious Results?  
14 *Evolutionary Biology*. doi:10.1007/s11692-018-9463-x
- 15 Cardini, A., & Elton, S. (2007). Sample size and sampling error in geometric morphometric studies of size and shape.  
16 *Zoomorphology*, 126(2), 121–134. doi:10.1007/s00435-007-0036-2
- 17 Cardini, A., Jansson, A., & Elton, S. (2007). A geometric morphometric approach to the study of ecogeographical and  
18 clinal variation in vervet monkeys. *Journal of Biogeography*, 34(10), 1663–1678. doi:10.1111/j.1365-  
19 2699.2007.01731.x
- 20 Cardini, A., & Elton, S. (2017). Is there a "Wainer's rule"? Testing which sex varies most as an example analysis using  
21 GueSDat, the free Guenon Skull Database. *Hystrix, the Italian journal of mammalogy*, 28(2), 147–156.  
22 doi.org/10.4404/hystrix-28.2-12139
- 23 Cardini, A., & Loy, A. (2013). On growth and form in the "computer era": from geometric to biological morphometrics.  
24 *Hystrix, the Italian journal of mammalogy*, 24, 1-5. doi.org/10.4404/hystrix-24.1-8749
- 25 Cardini, A., Seetah, K., & Barker, G. (2015). How many specimens do I need? Sampling error in geometric  
26 morphometrics: testing the sensitivity of means and variances in simple randomized selection experiments.  
27 *Zoomorphology*, 134(2), 149–163. doi:10.1007/s00435-015-0253-z
- 28 Culhane, A. C., Perrière, G., Considine, E. C., Cotter, T. G., & Higgins, D. G. (2002). Between-group analysis of  
29 microarray data. *Bioinformatics*, 18(12), 1600–1608. doi:10.1093/bioinformatics/18.12.1600
- 30 Ferretti, A., Cardini, A., Crampton, J. S., Serpagli, E., Sheets, H. D., & Štorch, P. (2013). Rings without a lord?  
31 Enigmatic fossils from the lower Palaeozoic of Bohemia and the Carnic Alps. *Lethaia*, 46(2), 211-222.  
32 doi.org/10.1111/let.12004
- 33 Fisher, R. A. (1936). The use of multiple measurements in taxonomic problems. *Annals of eugenics*, 7(2), 179–188.  
34 doi.org/10.1111/j.1469-1809.1936.tb02137.x

- 1 Galimberti, F., S. Sanvito, M. C. Vinesi and A. Cardini (2019). Nose-metrics of wild southern elephant seal (*Mirounga*  
2 *leonina*) males using photogrammetry and geometric morphometry. *Journal of Zoological Systematics & Evolutionary*  
3 *Research*, doi: 10.1111/jzs.12276.
- 4 Gunz, P., & Mitteroecker, P. (2013). Semilandmarks: a method for quantifying curves and surfaces. *Hystrix, the Italian*  
5 *journal of mammalogy*, 24 (1) 103–109. doi.org/10.4404/hystrix-24.1-6292
- 6 Hair, J.F., Black, W.C., Babin, B.J. and Anderson, R.E., 2009. *Multivariate Data Analysis, 7th Edition*. Pearson  
7 Prentice Hall.
- 8 Houle, D. (2009). Colloquium Paper: Numbering the hairs on our heads: The shared challenge and promise of  
9 phenomics, *Proceedings of the National Academy of Sciences (USA)*, 107 (suppl. 1), 1793–1799.  
10 doi.org/10.1073/pnas.0906195106
- 11 Izenman, A. J. (2008) *Modern Statistical Techniques: Regression, Classification, and Manifold Learning*. Springer.
- 12 Kovarovic, K., Aiello, L. C., Cardini, A., & Lockwood, C. A. (2011). Discriminant function analyses in archaeology:  
13 are classification rates too good to be true? *Journal of Archaeological Science*, 38(11), 3006–3018.
- 14 Mahalanobis, P. C. (1936). On the generalized distance in statistics. *Proceedings National Institute of Science, India*,  
15 2(1), 49-55.
- 16 Mitteroecker, P., & Bookstein, F. (2011). Linear Discrimination, Ordination, and the Visualization of Selection  
17 Gradients in Modern Morphometrics. *Evolutionary Biology*, 38(1), 100–114. doi:10.1007/s11692-011-9109-8
- 18 Mitteroecker, P., Gunz, P., & Bookstein, F. L. (2005). Heterochrony and geometric morphometrics: a comparison of  
19 cranial growth in *Pan paniscus* versus *Pan troglodytes*. *Evolution & Development*, 7(3), 244–258. doi:10.1111/j.1525-  
20 142X.2005.05027.x
- 21 Oxnard, C., & O’Higgins, P. (2011). Biology Clearly Needs Morphometrics. Does Morphometrics Need Biology?  
22 *Biological Theory*, 4(1), 84–97. doi:i: 10.1162/biot.2009.4.1.84
- 23 Reyment, R. A. (2010). Morphometrics: An Historical Essay. In A. M. T. Elewa (Ed.), *Morphometrics for*  
24 *Nonmorphometricians* (Vol. 124, 9–24). Berlin, Heidelberg: Springer Berlin Heidelberg.  
25 <http://www.springerlink.com/content/c6743496220p4892/>. Accessed 21 December 2011.
- 26 Rohlf, F. J., & Slice, D. (1990). Extensions of the Procrustes Method for the Optimal Superimposition of Landmarks.  
27 *Systematic Zoology*, 39(1), 40–59. doi:10.2307/2992207
- 28 Schlager, S. (2017). Morpho and Rvcg – Shape Analysis in R. In G. Zheng, S. Li, & G. Székely (Eds.), *Statistical*  
29 *Shape and Deformation Analysis*, (pp. 217–256). Academic Press.
- 30 Seetah, T. K., Cardini, A., & Miracle, P. T. (2012). Can morphospace shed light on cave bear spatial-temporal  
31 variation? Population dynamics of *Ursus spelaeus* from Romualdova pećina and Vindija, (Croatia), *Journal of*  
32 *Archaeological Science*, 39(2), 500–510. doi.org/10.1016/j.jas.2011.10.005
- 33 Siberchicot, A., Julien-Laferrrière, A., Dufour, A.-B., Thioulouse, J., & Dray, S. (2017). adegraphics: An S4 Lattice-  
34 Based Package for the Representation of Multivariate Data. *The R Journal*, 9(2), 198–212. doi.org/10.32614/RJ-2017-  
35 042.

- 1 Skinner, M. M., Gunz, P., Wood, B. A., & Hublin, J. J. (2009). How many landmarks? Assessing the classification  
2 accuracy of Pan lower molars using a geometric morphometric analysis of the occlusal basin as seen at the enamel-  
3 dentine junction. In *Comparative Dental Morphology* (Vol. 13, pp. 23-29). Karger Publishers. doi:  
4 10.1159/000242385
- 5 Slice, D. E. (2005). Modern morphometrics. In *Modern morphometrics in physical anthropology* (pp. 1-45). Springer,  
6 Boston, MA.
- 7 Watanabe A (2018) How many landmarks are enough to characterize shape and size variation? *PLoS ONE*, 13(6):  
8 e0198341. <https://doi.org/10.1371/journal.pone.0198341>
- 9 Yendle, P. W., & MacFie, H. J. (1989). Discriminant principal components analysis. *Journal of chemometrics*, 3(4),  
10 589-600. [doi.org/10.1002/cem.1180030407](https://doi.org/10.1002/cem.1180030407)

11

12

# 1 Figures and Tables

2

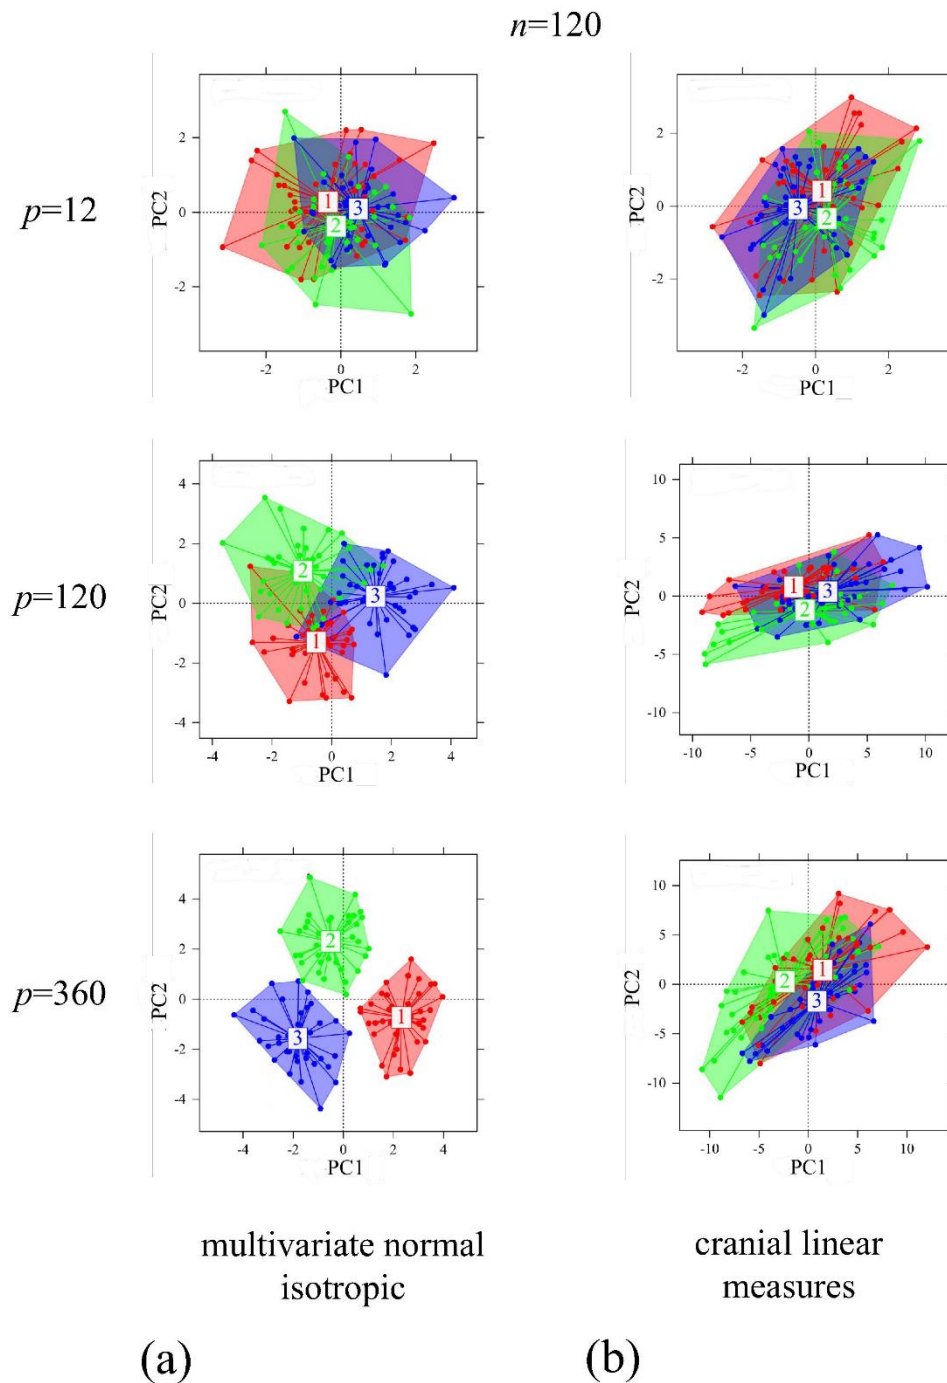

Fig. 1

3

4 Fig. 1. bgPCA scatterplots (computed using Morpho – Schlager 2017 – and drawn using

5 Adegraphics – Siberchicot et al. 2017) showing the increasing spurious separation of random

6 groups as  $p/n$  increases: A) normal multivariate isotropic (i.e., uncorrelated variables) model; B)



1 normal multivariate model with covarying variables (based on the covariance matrix of a set of  
2 adult male vervet cranial linear measurements).  
3

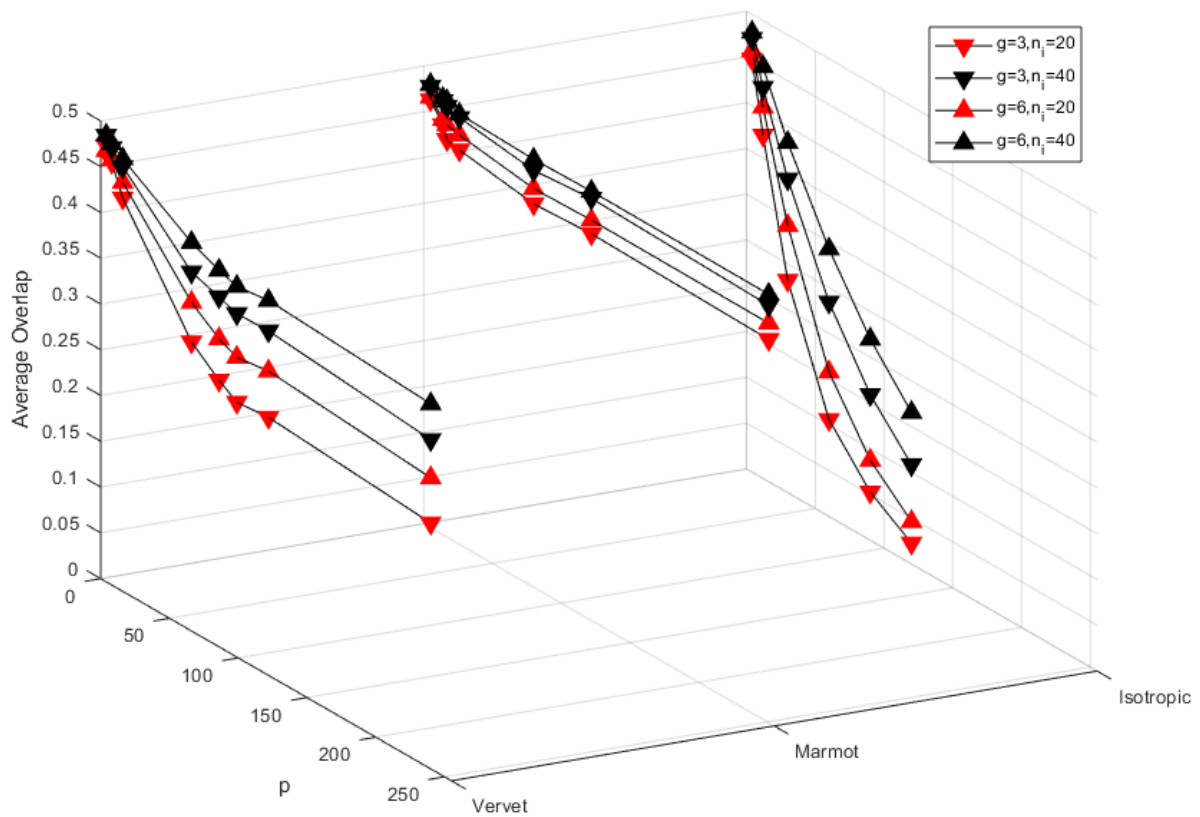

4  
5 Fig. 2. Plots of  $\bar{O}_{ij}$  (average overlap between groups) from sampling experiments for three  
6 models: Mod1 (isotropic), Mod2 (Marmot Procrustes shape coordinates), and Mod3 (Vervet  
7 Procrustes shape coordinates), using  $g = 3$  or  $6$  groups and  $n_i = 20$  and  $40$ . In all models, there is  
8 less overlap when there are fewer groups and smaller  $n_i$  as  $p$  increases.  
9

1

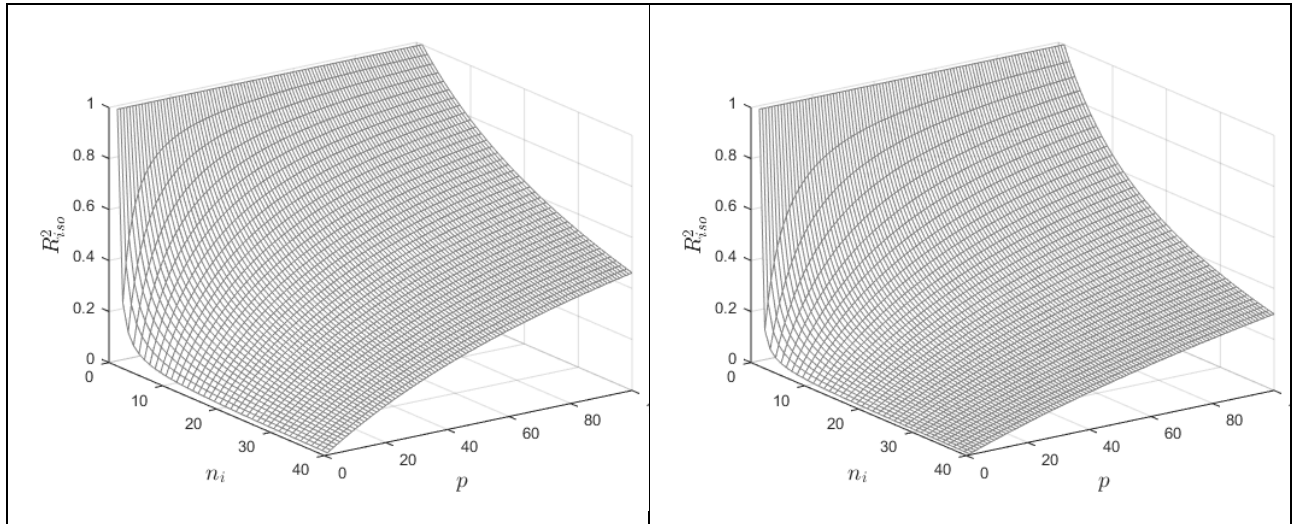

2

3 Fig. 3. Expected relationship between  $R^2_{iso}$  and  $n_i$  and  $p$ . A. For  $g = 3$ . B. For  $g = 6$  groups. Note  
4 that the height of the surface is lower when larger sample sizes are larger, more groups, and fewer  
5 variables (see Table 2).

6

7

1

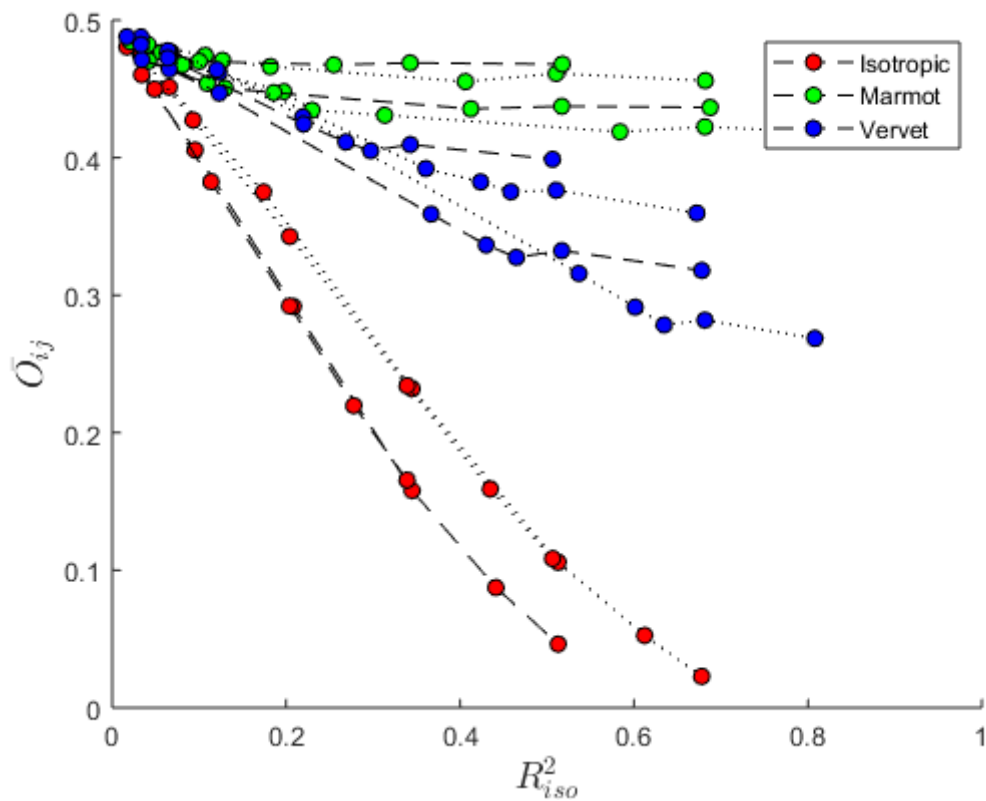

2

3 Fig. 4. A scatterplot of  $R_{iso}^2$  (average overlap between groups) against  $R_{iso}^2$  using the results of the  
4 sampling experiment shown in Fig. 2. Within each dataset it shows a tight negative relationship  
5 between  $\bar{O}_{ij}$  and  $R_{iso}^2$  with a shallower slope for datasets that have more highly correlated variables.  
6 Dotted lines connect points for  $g = 3$  groups and dashed lines for  $g = 6$  groups. For isotropic data  
7  $R_{iso}^2$  is smaller when there are more groups. Curves for different sample sizes are plotted but  
8 indistinguishable.

9

1

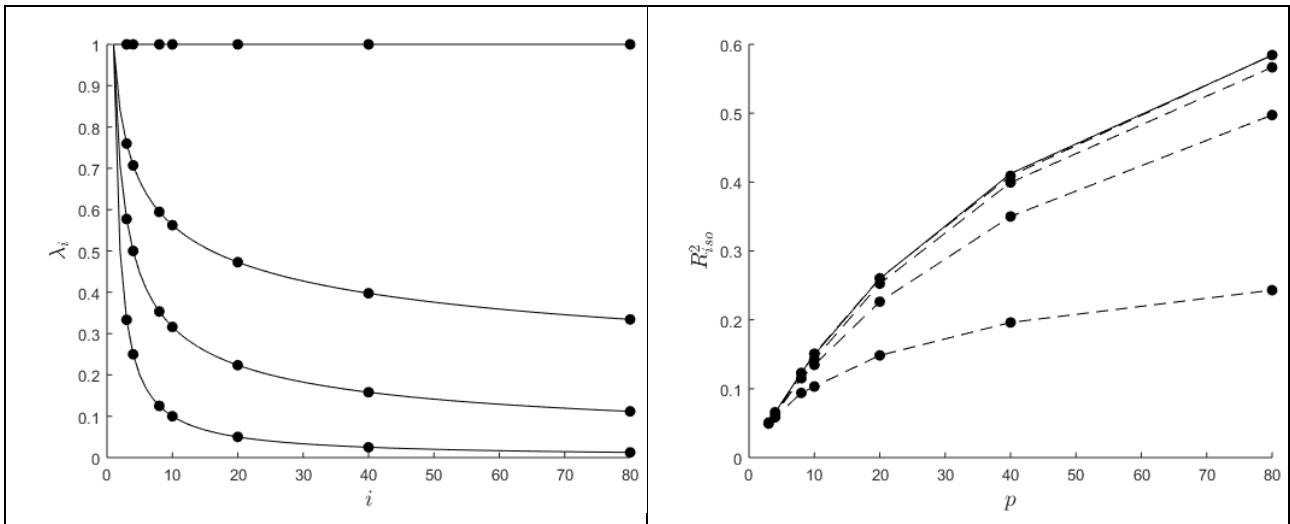

2

3

4 Fig. 5. A. Plot showing the effect of varying  $b$  the rate of decrease of the eigenvalues ( $\lambda$ ) for a  
 5 hypothetical covariance matrix with  $p = 80$  variables. The curve for  $b = 1$  is similar to those usually  
 6 observed in morphometric data. B. Plot showing  $R^2_{iso}$  values for the results of sampling  
 7 experiments for simulated data based on the models shown in Fig 5A. The slope  $b$  was varied from  
 8 0 to 1 to increase the level of correlation among the variables. Experiments were performed using  
 9 1000 replicates for  $g = 3$  groups of size  $n_i = 20$ . The solid line shows the expected relationship,  
 10  $R^2_{iso} = p / (p + g(n_i - 1))$ , for uncorrelated data that closely matches the results from this sampling  
 11 experiment. This plot shows that for the bgPCA method the proportion of the total variance  
 12 accounted for by the variance among groups is expected to increase as the number of variables  
 13 increases but less so as the overall level of correlation among the variables increases. For large  $n_i$ ,  
 14 the slope of the curve would approach the abscissa if the correlations were such that only the first  $g$ -  
 15 1 eigenvalues were greater than 0.

16

17

1 Table 1. Examples of papers showing the wide range of  $p/n$  ratios used in Procrustean GM studies  
 2 involving groups. The number of shape coordinates is used as a proxy for  $p$  (i.e., without  
 3 considering the loss of dimensions in the superimposition and, if applicable, because of sliding  
 4 semilandmarks or 'symmetrization').  $n$  is either the number of individuals or, if individuals were  
 5 averaged in the between group analyses, the number of taxa. The average number of specimens per  
 6 group (with  $g$  being the number of groups) is also shown. Studies using bgPCA are emphasized in  
 7 bold while the column with  $p/n$  ratios is emphasized in light grey.

8  
9

| study                                         | Semilandmarks |            |           |           | $p/n$       | URL and doi |                                                                                                                                                               |
|-----------------------------------------------|---------------|------------|-----------|-----------|-------------|-------------|---------------------------------------------------------------------------------------------------------------------------------------------------------------|
|                                               | used?         | $n$        | $g$       | $n/g$     |             |             | $p$                                                                                                                                                           |
| <b>Hublin et al., 2017 (root surface)</b>     | yes           | <b>69</b>  | <b>5</b>  | <b>14</b> | <b>1650</b> | <b>24</b>   | <a href="https://doi.org/10.1016/j.jhevol.2018.04.001">https://doi.org/10.1016/j.jhevol.2018.04.001</a>                                                       |
| Neubauer et al., 2018                         | yes           | 132        | 5         | 26        | 2805        | 21          | <a href="https://doi.org/10.1016/j.jhevol.2018.04.002">https://doi.org/10.1016/j.jhevol.2018.04.002</a>                                                       |
| Torres-Tamayo et al., 2017                    | yes           | 80         | 4         | 20        | 1245        | 16          | doi: 10.1111/joa.12743                                                                                                                                        |
| <b>Knigge et al., 2015</b>                    | yes           | <b>87</b>  | <b>4</b>  | <b>22</b> | <b>567</b>  | <b>6.5</b>  | DOI 10.1002/ar.23069                                                                                                                                          |
| <b>Gunz et al., 2012</b>                      | yes           | <b>80</b>  | <b>3</b>  | <b>27</b> | <b>312</b>  | <b>3.9</b>  | doi: 10.1111/j.1469-7580.2012.01493.x                                                                                                                         |
| Gunz et al., 2016                             | yes           | 80         | 2         | 40        | 312         | 3.9         | <a href="https://doi.org/10.1002/(SICI)1097-0185(201607)39:7&lt;AR7%3E3.0.CO;2-W">https://doi.org/10.1002/(SICI)1097-0185(201607)39:7&lt;AR7%3E3.0.CO;2-W</a> |
| Bookstein et al., 1999                        | yes           | 21         | 8         | 3         | 50          | 2.4         | <a href="https://doi.org/10.1002/(SICI)1097-0185(199907)22:7&lt;AR7%3E3.0.CO;2-W">https://doi.org/10.1002/(SICI)1097-0185(199907)22:7&lt;AR7%3E3.0.CO;2-W</a> |
| Schlager & Ruedel, 2015                       | yes           | 534        | 4         | 4         | 1110        | 2.1         | DOI: 10.1002/ajpa.22749                                                                                                                                       |
| <b>Baab, 2016 (Bodo dataset)</b>              | -             | <b>24</b>  | <b>2</b>  | <b>12</b> | <b>42</b>   | <b>1.8</b>  | <a href="http://dx.doi.org/10.1016/j.jhevol.2015.11.001">http://dx.doi.org/10.1016/j.jhevol.2015.11.001</a>                                                   |
| <b>Gonzalez et al., 2013</b>                  | -             | <b>59</b>  | <b>5</b>  | <b>12</b> | <b>93</b>   | <b>1.6</b>  | DOI: 10.1111/ede.12025                                                                                                                                        |
| <b>Sansalone et al., 2018</b>                 | -             | <b>53</b>  | <b>2</b>  | <b>27</b> | <b>72</b>   | <b>1.4</b>  | DOI 10.1007/s10914-016-9370-9                                                                                                                                 |
| <b>Domjanic et al., 2015</b>                  | yes           | <b>134</b> | <b>2</b>  | <b>67</b> | <b>170</b>  | <b>1.3</b>  | DOI: 10.1002/ajpa.22752                                                                                                                                       |
| Benazzi et al., 2011                          | yes           | 38         | 3         | 13        | 48          | 1.3         | doi:10.1038/nature10617                                                                                                                                       |
| <b>Harvati et al., 2013</b>                   | yes           | <b>268</b> | <b>17</b> | <b>16</b> | <b>300</b>  | <b>1.1</b>  |                                                                                                                                                               |
| <b>Green et al., 2015</b>                     | yes           | <b>279</b> | <b>5</b>  | <b>56</b> | <b>258</b>  | <b>0.9</b>  | DOI: 10.1002/ajpa.22695                                                                                                                                       |
| Gomez-Robles et al., 2011                     | yes           | 129        | 10        | 13        | 94          | 0.7         | doi:10.1111/j.1558-5646.2011.01244.x                                                                                                                          |
| <b>Chiozzi et al., 2018 (fish body)</b>       | yes           | <b>62</b>  | <b>5</b>  | <b>12</b> | <b>44</b>   | <b>0.7</b>  | <a href="https://doi.org/10.1111/bij.12239">https://doi.org/10.1111/bij.12239</a>                                                                             |
| <b>Kubiak et al., 2017</b>                    | -             | <b>85</b>  | <b>4</b>  | <b>21</b> | <b>60</b>   | <b>0.7</b>  | DOI:10.1038/s41598-017-16243-2                                                                                                                                |
| Cucchi et al., 2011                           | yes           | 114        | 9         | 13        | 80          | 0.7         | DOI:10.1038/s41598-017-16243-2                                                                                                                                |
| <b>Fruciano et al., 2017 (only landmarks)</b> | -             | <b>138</b> | <b>23</b> | <b>6</b>  | <b>93</b>   | <b>0.7</b>  | DOI: 10.1002/ece3.3256                                                                                                                                        |
| Serb et al., 2017                             | yes           | 933        | 6         | 6         | 506         | 0.5         | doi: 10.1111/jeb.13137                                                                                                                                        |
| <b>Pallares et al., 2016</b>                  | -             | <b>249</b> | <b>9</b>  | <b>28</b> | <b>132</b>  | <b>0.5</b>  | DOI 10.1007/s00427-016-0550-7                                                                                                                                 |
| <b>Chemisquy et al., 2014 (upper molar)</b>   | yes           | <b>103</b> | <b>5</b>  | <b>21</b> | <b>52</b>   | <b>0.5</b>  | doi: 10.1111/zoj.12205                                                                                                                                        |
| Sanfilippo et al., 2010                       | -             | 160        | 2         | 80        | 72          | 0.5         | doi:10.1016/j.exer.2010.06.014                                                                                                                                |

|                                          |     |     |     |     |     |                                                                                                 |                                                                                                     |
|------------------------------------------|-----|-----|-----|-----|-----|-------------------------------------------------------------------------------------------------|-----------------------------------------------------------------------------------------------------|
| <b>Fruciano et al., 2016 (fish body)</b> | yes | 122 | 2   | 61  | 44  | 0.4                                                                                             | doi: 10.1002/ece3.2184                                                                              |
| <b>Seetah et al., 2012</b>               | -   | 67  | 4   | 17  | 24  | 0.4                                                                                             | DOI 10.1002/ar.23065                                                                                |
| <b>Cooke &amp; Terhune, 2015</b>         | -   | 169 | 7   | 24  | 60  | 0.4                                                                                             | DOI 10.1002/ar.23065                                                                                |
| <b>Ritzman et al., 2016</b>              | yes | 315 | 4   | 79  | 90  | 0.3                                                                                             | <a href="https://doi.org/10.1016/j.jhevol.2016.09">https://doi.org/10.1016/j.jhevol.2016.09</a>     |
| Klenovšek et al., 2016                   | -   | 215 | 6   | 36  | 58  | 0.3                                                                                             | <a href="http://www.ctoz.nl/vol85/nr03/a02">http://www.ctoz.nl/vol85/nr03/a02</a>                   |
| Franklin et al., 2013                    | -   | 380 | 2   | 0   | 93  | 0.2                                                                                             | <a href="http://dx.doi.org/10.1016/j.forsciint.2013">http://dx.doi.org/10.1016/j.forsciint.2013</a> |
| Cardini & Elton, 2008                    | -   | 630 | 38  | 258 | 0.2 | <a href="https://doi.org/10.1111/j.1095-8312.2008">https://doi.org/10.1111/j.1095-8312.2008</a> |                                                                                                     |
| Fruciano et al., 2011                    | -   | 223 | 9   | 25  | 40  | 0.2                                                                                             | <a href="https://doi.org/10.1111/j.1095-8312.2011">https://doi.org/10.1111/j.1095-8312.2011</a>     |
| Corti et al., 2001                       | -   | 277 | 12  | 23  | 44  | 0.2                                                                                             | <a href="https://doi.org/10.1017/S095283690100">https://doi.org/10.1017/S095283690100</a>           |
| Ivanovic et al., 2009                    | -   | 166 | 9   | 18  | 26  | 0.2                                                                                             | DOI 10.1007/s00435-009-0085-9                                                                       |
| Dapporto et al., 2011                    | -   | 130 | 2   | 65  | 20  | 0.2                                                                                             | DOI 10.1007/s00435-011-0130-3                                                                       |
| Cardini & O'Higgins, 2004                | -   | 354 | 14  | 25  | 52  | 0.1                                                                                             | <a href="https://doi.org/10.1111/j.1095-8312.2004">https://doi.org/10.1111/j.1095-8312.2004</a>     |
| <b>Souto-Lima &amp; Millien (skull)</b>  | -   | 212 | 3   | 71  | 30  | 0.1                                                                                             | <a href="https://doi.org/10.1111/bij.12263">https://doi.org/10.1111/bij.12263</a>                   |
| <b>Franchini et al., 2014</b>            | -   | 297 | 3   | 99  | 40  | 0.1                                                                                             | doi: 10.1111/mec.12590                                                                              |
| Cardini, 2003                            | -   | 388 | 14  | 28  | 18  | 5                                                                                               | DOI: 10.1080/10635150390192807                                                                      |
| Astua, 2009                              | -   | 107 | 656 | 19  | 38  | 4                                                                                               | doi:10.1111/j.1558-5646.2009.00720.x                                                                |

1  
2  
3

1 Table 2. MANOVA-style table summarizing expectations after a bgPCA transformation with  $g$   
 2 equal-sized samples of size  $n_i$  all drawn from the same  $p$ -dimensional normally distributed  
 3 population with mean  $\boldsymbol{\mu} = \mathbf{0}_p$  (a vector of  $p$  zeros) and covariance matrix  $\boldsymbol{\Sigma} = \mathbf{I}_p$  (a  $p \times p$  identity  
 4 matrix). The expressions for the traces of the SS matrices are given along with their MS after  
 5 division by degrees of freedom. The  $F_{iso}$  ratio is also given in analogy to the usual  $F$  ratio and the  
 6 proportion of the total variation accounted for by differences among means,  $R_{iso}^2$ , is also given  
 7 (note: these are not the usual  $F$  and  $R^2$  coefficients from an anova or a multiple regression analysis –  
 8 they are expected values assuming the isotropic model). The table also assumes equal-sized samples  
 9 and thus  $n = gn_i$ . Note that, unlike a standard MANOVA where one estimates between-group  
 10 variance relative to within-group using all original variables, here computations are only within the  
 11  $g-1$  dimensions of the bgPCA transformed data. This means that the within-group component  
 12 shown in the table only refers to the residual variance left unexplained by groups in the  $g-1$   
 13 dimensional bgPCA space (i.e., the within-group variation one sees in the scatterplots such as in  
 14 Fig. 1).

| Source of variation | df                                                                    | Trace SS                                                                                      | Trace MS                        | $F_{iso}$ Ratio |
|---------------------|-----------------------------------------------------------------------|-----------------------------------------------------------------------------------------------|---------------------------------|-----------------|
| Among               | $g - 1$                                                               | $tr(\mathbf{A}') = p(g - 1)$                                                                  | $p$                             | $p / (g - 1)$   |
| Within              | $g(n_i - 1)$                                                          | $tr(\mathbf{W}') = \frac{(g - 1)}{p} pg(n_i - 1) = (g - 1)g(n_i - 1)$                         | $g - 1$                         |                 |
| Total               | $g(n_i - 1)$                                                          | $tr(\mathbf{A}' + \mathbf{W}') = (g - 1)p + (g - 1)g(n_i - 1)$<br>$= (g - 1)(p + g(n_i - 1))$ | $(p + g(n_i - 1)) / (gn_i - 1)$ |                 |
| $R_{iso}^2$         | $\frac{p(g - 1)}{(g - 1)(p + g(n_i - 1))} = \frac{p}{p + g(n_i - 1)}$ |                                                                                               |                                 |                 |

16  
 17  
 18



1  
 2 Table 3. Two examples of sampling experiments selected among 10,000 replicates of the null  
 3 model with all samples drawn from the same independent and normally distributed population with  
 4 mean 0 and variance 1. Expected values based on Table 2 are given in parentheses. The upper table  
 5 is an example with smaller  $p$  and large sample sizes. The lower table has a larger  $p$  and smaller  
 6 sample sizes. As with Table 2, all computations are done using only using the  $g-1 = 2$  dimensions  
 7 from a bgPCA.

8

| $p = 20, g = 3, n_i = 40$     |     |                |                 |                 |
|-------------------------------|-----|----------------|-----------------|-----------------|
| Source of variation           | df  | Trace SS       | Trace MS        | $F_{iso}$ Ratio |
| Among                         | 2   | 20.0380 (20)   | 10.0190 (10)    | 10.1124 (10)    |
| Within                        | 117 | 116.9471 (117) | 0.9995 (1)      |                 |
| Total                         | 59  | 136.9851 (137) | 1.1511 (1.1513) |                 |
| $R_{iso}^2 = 0.1460$ (0.1460) |     |                |                 |                 |

9

| $p = 80, g = 3, n_i = 10$     |    |                |                 |                 |
|-------------------------------|----|----------------|-----------------|-----------------|
| Source of variation           | df | Trace SS       | Trace MS        | $F_{iso}$ Ratio |
| Among                         | 2  | 79.96975 (80)  | 39.9849 (40)    | 41.4724 (40)    |
| Within                        | 27 | 27.0319 (27)   | 1.0012 (1)      |                 |
| Total                         | 29 | 107.0016 (107) | 3.6897 (3.6897) |                 |
| $R_{iso}^2 = 0.7469$ (0.7477) |    |                |                 |                 |

10  
 11  
 12
